# Supplementary material for: Proteogenomics Uncovers Critical Elements of Host Response in Bovine Soft Palate Epithelial Cells Following In Vitro Infection with Foot-And-Mouth Disease Virus
Source: MDPI journal article supplement (doi:10.3390/v11010053), 2019-01-12
Supplement: s1 [file s1]

Pfaff *et al.*: Proteogenomics uncovers critical elements of host response in bovine soft palate epithelial cells following *in vitro* infection with foot-and-mouth disease virus

**A**

Inoculation with FMDV (or mock),  
Incubation for up to 28 days

Soft palate tissue is collected after slaughter  
Primary soft palate cells cultured at air-liquid interface  
TRIzol extraction  
RNA  
proteins

RNAseq  
RT-qPCR  
quantitative proteomics

differentially expressed genes  
confirmation of selected genes  
corroborating evidence on protein level

**B**

|            | before inoculation | 02 hpi  | 24 hpi  | 48 hpi  | 7 dpi   | 28 dpi  |
|------------|--------------------|---------|---------|---------|---------|---------|
| RNAseq     | mock               | ■ ■ ■ ■ |         | ■ ■ ■ ■ |         | ■ ■ ■ ■ |
|            | FMDV               |         | ■ ■ ■ ■ | ■ ■ ■ ■ |         | ■ ■ ■ ■ |
| RT-qPCR    | mock               | ■ ■ ■ ■ | ■ ■ ■ ■ | ■ ■ ■ ■ | ■ ■ ■ ■ | ■ ■ ■ ■ |
|            | FMDV               | ■ ■ ■ ■ | ■ ■ ■ ■ | ■ ■ ■ ■ | ■ ■ ■ ■ | ■ ■ ■ ■ |
| proteomics | mock               | ■ ■ ■ ■ |         | ■ ■ ■ ■ |         | ■ ■ ■ ■ |
|            | FMDV               |         | ■ ■ ■ ■ | ■ ■ ■ ■ | ■ ■ ■ ■ | ■ ■ ■ ■ |

**Figure S1.** Schematic visualization of the proteogenomic workflow. (A). Soft palate (SP) tissue was received from two cattle that were slaughtered for food production. A primary SP cell culture was established at an air-liquid interface und was subsequently inoculated with lysate from infected (FMDV) or uninfected (mock) cell cultures. The inoculated SP cell cultures were then incubated for up to 28 days. At each sample time point, two replicate cultures were harvested and total RNA and proteins were isolated using TRIzol. The RNA fraction was used for comparative RNA sequencing and identification of differentially expressed genes. Among these, six target genes and two reference genes were selected for confirmation by RT-qPCR. Furthermore, the corresponding protein fraction was used for quantitative proteomics in order to corroborate the transcription data on the protein level. (B) Replicate SP cell cultures from the two animals (1 and 2, black silhouettes) were harvested at different time points: immediately before inoculation, 2 hours post inoculation (hpi), 24 hpi, 48 hpi, 7 days post inoculation (dpi) and 28 dpi. The heatmap shows the number of replicates (squares) from mock (blue) and FMDV infected (orange) cell cultures that have been analyzed using RNA sequencing, RT-qPCR or proteomics at each time point.

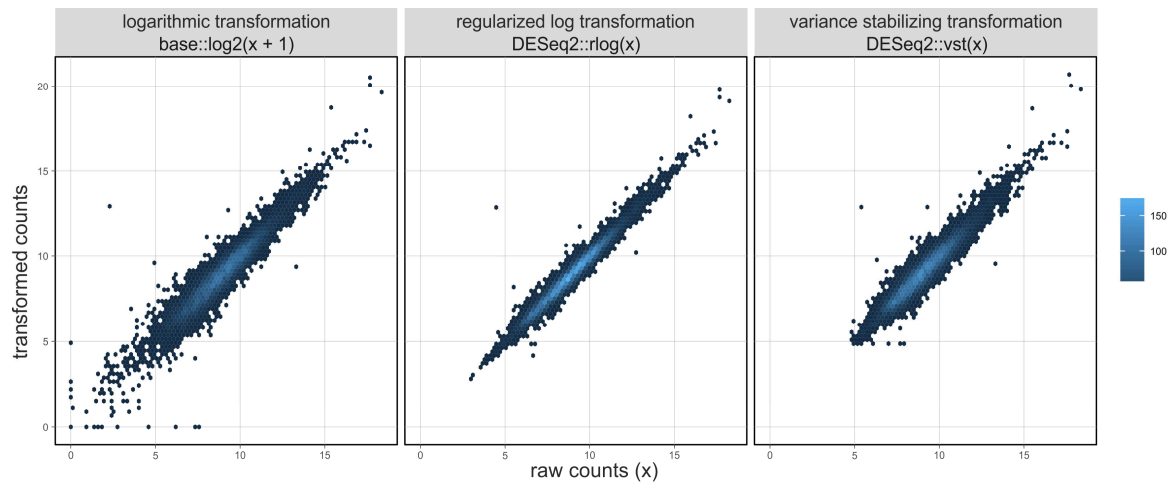

**Figure S2.** Comparison of different transformation methods for the raw reads counts per gene. The log2 transformation using sequence depth normalized counts (left) shows high deviation of transformed from raw counts that may artificially contribute to data variance. The regularized log (middle) and the variance stabilizing transformation as implemented in DESeq2 considers sequence depth and performs better than the logarithmic transformation. For variance-based approaches, the regularized log transformation was chosen as the best performing model. The color corresponds to the number of binned per gene counts and the function corresponds to the used R package and call.

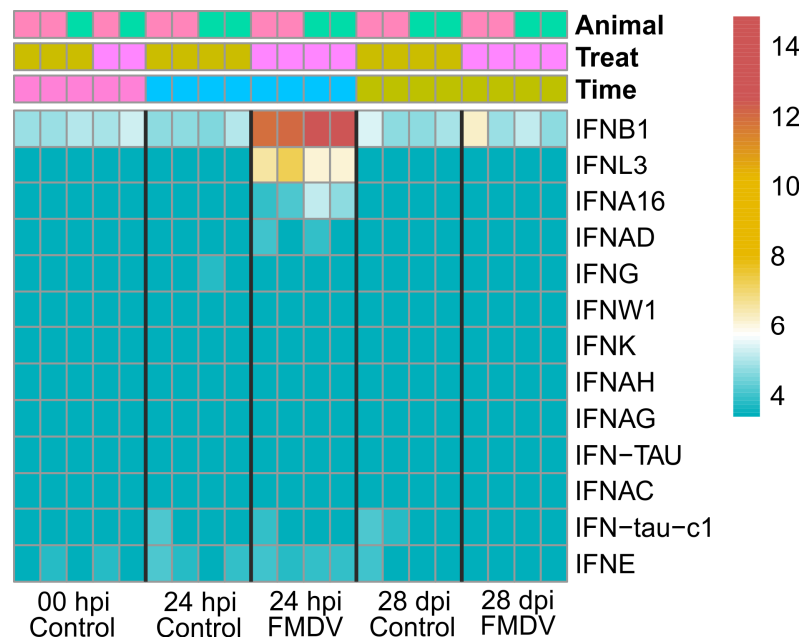

**Figure S3.** Comparison of interferon expression. The raw read counts for all available interferon typ I, II and III genes were extracted from an unfiltered dataset and transformed using the variance stabilizing transformation (vst) method, in order to avoid negative values for better visibility. The transformed data was visualized in a heatmap, were rows represent genes and columns represent samples from different time points (00 hpi, 24 hpi and 28 dpi), treatments (FMDV or controls) and animals.

## Supplementary Tables

**Table S1.** Summary of primary soft palate cell culture samples used for RNA sequencing along with information on experimental treatment, such as inoculation agent and time as well as animal-specific properties and outcome of sequencing.

| No | Sample ID | Treatment | Time   | Animal | Total Reads |
|----|-----------|-----------|--------|--------|-------------|
| 1  | lib02459  | control   | 0 hpi  | 1 (♀)  | 23,764,020  |
| 2  | lib02460  | control   | 0 hpi  |        | 23,830,051  |
| 3  | lib02453  | control   | 24 hpi |        | 23,679,150  |
| 4  | lib02454  | control   | 24 hpi |        | 25,959,245  |
| 5  | lib02451  | FMDV      | 24 hpi |        | 24,194,883  |
| 6  | lib02452  | FMDV      | 24 hpi |        | 26,512,041  |
| 7  | lib02457  | control   | 28 dpi |        | 24,502,499  |
| 8  | lib02458  | control   | 28 dpi |        | 24,923,161  |
| 9  | lib02455  | FMDV      | 28 dpi |        | 22,879,371  |
| 10 | lib02456  | FMDV      | 28 dpi |        | 25,383,683  |
| 11 | lib02343  | control   | 0 hpi  | 2 (♂)  | 23,766,199  |
| 12 | lib02344  | control   | 0 hpi  |        | 24,205,215  |
| 13 | lib02360  | control   | 0 hpi  |        | 25,499,001  |
| 14 | lib02362  | control   | 24 hpi |        | 25,545,365  |
| 15 | lib02346  | control   | 24 hpi |        | 24,372,618  |
| 16 | lib02361  | FMDV      | 24 hpi |        | 25,894,882  |
| 17 | lib02345  | FMDV      | 24 hpi |        | 24,405,453  |
| 18 | lib02348  | control   | 28 dpi |        | 28,018,704  |
| 19 | lib02350  | control   | 28 dpi |        | 24,381,295  |
| 20 | lib02347  | FMDV      | 28 dpi |        | 21,855,393  |
| 21 | lib02349  | FMDV      | 28 dpi |        | 24,818,395  |

**Table S2.** Summary of excluded and included RNA reference transcripts. A total of 57,846 RNA sequences of the *Bos taurus* reference genome (GCF000003055.6 Bos Taurus UMD 3.1.1) were filtered according to their RNA feature qualifiers and only a subset of reference sequences were further included in the analysis of differently expressed genes

|                 | Qualifier           | Entries       | Description                                                            |
|-----------------|---------------------|---------------|------------------------------------------------------------------------|
| <b>Included</b> |                     |               |                                                                        |
|                 | mRNA                | 48,655        | messenger RNA                                                          |
|                 | partial mRNA        | 335           | partial messenger RNA                                                  |
|                 | ncRNA               | 6169          | non-coding RNA <200 nt                                                 |
|                 | non-coding RNA      | 25            | non-coding RNA <200 nt                                                 |
|                 | long non-coding RNA | 43            | non-coding RNA >200 nt                                                 |
|                 | misc RNA            | 1808          | any transcript or RNA product that cannot be defined by other RNA keys |
|                 | <b>total</b>        | <b>57,035</b> |                                                                        |
| <b>Excluded</b> |                     |               |                                                                        |
|                 | microRNA            | 806           | micro RNA ~22 nt                                                       |
|                 | telomerase RNA      | 1             | RNA component of telomerase                                            |
|                 | ribosomal RNA       | 2             | ribosomal ribonucleic acid                                             |
|                 | RNase MRP RNA       | 1             | RNA molecule essential for the catalytic activity of RNase MRP         |
|                 | SRP RNA             | 1             | signal recognition particle                                            |
|                 | <b>total</b>        | <b>811</b>    |                                                                        |

**S3 Table.** Replaced gene aliases of the *Bos taurus* reference genome (GCF000003055.6 Bos Taurus UMD 3.1.1)

| Original                                           | Replacement | Description                                        | Associated Accession                                                    |
|----------------------------------------------------|-------------|----------------------------------------------------|-------------------------------------------------------------------------|
| C28H10ORF10                                        | DEPP1       | Autophagy Regulator                                | NM_001046515.2                                                          |
| C10H15ORF48                                        | NMES1       | Normal mucosa of esophagus-specific gene 1 protein | NM_001206976.1                                                          |
| C7H19ORF66                                         | C19ORF66    | Repressor Of Yield Of Dengue Virus                 | NM_001038181.1                                                          |
| C1H21ORF91                                         | C21ORF91    | Cold Sore Susceptibility Gene 1                    | XM_005201150.3,<br>XM_005201152.3,<br>XM_010800942.2,<br>NM_001037617.2 |
| C1H3ORF38                                          | C3ORF38     | May be involved in apoptosis regulation            | NM_001206451.2,<br>XM_005201179.3                                       |
| PVRL2                                              | NECTIN2     | Nectin Cell Adhesion Molecule 2                    | XM_005219196.1,<br>XM_005219198.1                                       |
| C3H1ORF109                                         | C1ORF109    | May promote cancer cell proliferation.             | XM_010803595.2,<br>NM_001101892.1                                       |
| C8H9ORF91                                          | TMEM268     | Transmembrane Protein 268                          | XM_005210539.3,<br>XM_005210540.3,<br>XM_005210541.3,<br>XM_015472690.1 |
| C11H2ORF44                                         | WDCP        | WD Repeat And Coiled Coil Containing               | XM_005213088.3,<br>XM_015473568.1,<br>XM_002691506.5                    |
| LOC784525,<br>LOC525550,<br>LOC100337470,<br>IFNB3 | IFNB1       | Interferon beta 1                                  | XM_002689540.4,<br>XM_002689541.3,<br>XM_002689537.4,<br>NM_001114297.1 |

**S4 Table.** Sequences of primers used for the RT-qPCR analysis

| Target | Forward Primer (3' → 5') | Reverse Primer (3' → 5') |
|--------|--------------------------|--------------------------|
| ACTB   | CTCTTCCAGCCTTCCTTCCT     | GGCAGTGATCTCTTTCTGC      |
| ANKRD1 | GACGAAC TTCGGGTCAACAT    | CTCTGCCTCTCGCTGTTTCT     |
| CASP7  | GAACAGATGGCAAGACAGCA     | AACGGGGATTAGCATCAGTG     |
| GAPDH  | GGGTCATCATCTCTGCACCT     | GGTCATAAGTCCCTCCACGA     |
| IDO1   | TGCTGTATGAAGGCATCTGG     | TGAGCTGGTGGCATGTATGT     |
| IFIH1  | CGAAGTCAAAGAGCCACTCC     | TGCCCATGTTGCTGTTATGT     |
| NCAM1  | CATCTACAACGCCAACATCG     | CTTCTCCCTCCCTGAACTCC     |
| OAS2   | AACGAGTCACCTGGACCATC     | GCTGGAGAAAGTCCTTGACG     |

**S5 Table.** Differentially expressed genes with an adjusted p-value (padj) <0.001 and a |log2 fold change| (LFC) >1

| Gene     | Entrez ID | Gene Description                                          | 24 hpi |          | 28 dpi |          |
|----------|-----------|-----------------------------------------------------------|--------|----------|--------|----------|
|          |           |                                                           | LFC    | padj     | LFC    | padj     |
| ABCD4    | 5826      | ATP binding cassette subfamily D member 4                 | 3.06   | 1.83E-10 |        |          |
| ABHD1    | 84696     | abhydrolase domain containing 1                           | 5.72   | 6.33E-19 |        |          |
| ACSL5    | 51703     | acyl-CoA synthetase long chain family member 5            | 2.05   | 1.36E-07 |        |          |
| ADAR     | 103       | adenosine deaminase, RNA specific                         | 2.76   | 2.24E-11 |        |          |
| ADPGK    | 83440     | ADP dependent glucokinase                                 | 2.26   | 5.35E-05 |        |          |
| AIDA     | 64853     | axin interactor, dorsalization associated                 | 2.16   | 1.82E-08 |        |          |
| ALDH1A2  | 8854      | aldehyde dehydrogenase 1 family member A2                 |        |          | -3.09  | 7.84E-05 |
| ANKRD1   | 27063     | ankyrin repeat domain 1                                   |        |          | -4.19  | 6.58E-05 |
| ANXA1    | 301       | annexin A1                                                | 2.79   | 1.70E-13 |        |          |
| APOBEC3B | 9582      | apolipoprotein B mRNA editing enzyme catalytic subunit 3B | 2.88   | 2.80E-06 |        |          |
| AREL1    | 9870      | apoptosis resistant E3 ubiquitin protein ligase 1         | 1.79   | 2.74E-06 |        |          |
| ARF3     | 377       | ADP ribosylation factor 3                                 | 2.17   | 1.77E-04 |        |          |
| ARNTL2   | 56938     | aryl hydrocarbon receptor nuclear translocator like 2     | 3.30   | 3.11E-05 |        |          |
| ARSH     | 347527    | arylsulfatase family member H                             | 2.77   | 1.26E-07 |        |          |
| ATAD1    | 84896     | ATPase family, AAA domain containing 1                    | 2.59   | 5.03E-07 |        |          |
| ATP10A   | 57194     | ATPase phospholipid transporting 10A (putative)           | 2.91   | 5.49E-07 |        |          |
| ATP8B4   | 79895     | ATPase phospholipid transporting 8B4 (putative)           | 3.60   | 1.08E-25 |        |          |
| ATXN3    | 4287      | ataxin 3                                                  | 2.63   | 1.20E-05 |        |          |
| BAG3     | 9531      | BCL2 associated athanogene 3                              | 1.97   | 4.79E-05 |        |          |
| BATF2    | 116071    | basic leucine zipper ATF-like transcription factor 2      | 4.83   | 9.27E-56 |        |          |
| BCL2L12  | 83596     | BCL2 like 12                                              | 3.07   | 5.71E-13 |        |          |
| BHLHE41  | 79365     | basic helix-loop-helix family member e41                  | 3.48   | 1.36E-04 |        |          |
| BIN3     | 55909     | bridging integrator 3                                     | 2.00   | 2.56E-06 |        |          |
| BOLA-DMB | 282491    | major histocompatibility complex, class II, DM beta       | 3.63   | 1.41E-17 |        |          |
| BPNT1    | 10380     | 3'(2'), 5'-bisphosphate nucleotidase 1                    | 3.25   | 3.02E-13 |        |          |
| C19ORF66 |           |                                                           | 3.14   | 7.30E-08 |        |          |
| C1ORF109 |           |                                                           | 2.25   | 6.69E-08 |        |          |
| C21ORF91 |           |                                                           | 3.01   | 2.38E-05 |        |          |
| C3ORF38  |           |                                                           | 2.70   | 4.88E-11 |        |          |
| CA13     | 377677    | carbonic anhydrase 13                                     | -3.22  | 3.56E-04 |        |          |
| CALCOCO2 | 10241     | calcium binding and coiled-coil domain 2                  | 2.58   | 1.65E-08 |        |          |
| CASP4    | 837       | caspase 4                                                 | 2.98   | 1.07E-06 |        |          |
| CASP7    | 840       | caspase 7                                                 | 2.66   | 2.59E-13 |        |          |
| CCDC82   | 79780     | coiled-coil domain containing 82                          | 1.92   | 4.37E-05 |        |          |
| CCL2     | 6347      | C-C motif chemokine ligand 2                              | 3.17   | 3.24E-10 |        |          |
| CCL5     | 6352      | C-C motif chemokine ligand 5                              | 6.66   | 8.74E-19 | 4.70   | 3.02E-07 |
| CCL8     | 6355      | C-C motif chemokine ligand 8                              | 11.79  | 1.00E-21 |        |          |
| CD200    | 4345      | CD200 molecule                                            | 3.30   | 1.19E-05 |        |          |
| CD274    | 29126     | CD274 molecule                                            | 4.67   | 2.71E-25 |        |          |
| CD40     | 958       | CD40 molecule                                             | 4.29   | 2.84E-13 |        |          |

|                 |        |                                                           |       |          |       |          |
|-----------------|--------|-----------------------------------------------------------|-------|----------|-------|----------|
| <b>CD83</b>     | 9308   | CD83 molecule                                             | 5.08  | 8.81E-05 |       |          |
| <b>CDADC1</b>   | 81602  | cytidine and dCMP deaminase domain containing 1           | 3.40  | 1.25E-33 |       |          |
| <b>CDKN2AIP</b> | 55602  | CDKN2A interacting protein                                | 3.19  | 1.10E-18 |       |          |
| <b>CELA3B</b>   | 23436  | chymotrypsin like elastase family member 3B               | 2.78  | 1.54E-04 |       |          |
| <b>CFLAR</b>    | 8837   | CASP8 and FADD like apoptosis regulator                   | 2.88  | 2.79E-05 |       |          |
| <b>CHST12</b>   | 55501  | carbohydrate sulfotransferase 12                          | 1.88  | 1.19E-04 |       |          |
| <b>CLEC2D</b>   | 29121  | C-type lectin domain family 2 member D                    | 3.45  | 7.80E-08 |       |          |
| <b>CMPK2</b>    | 129607 | cytidine/uridine monophosphate kinase 2                   | 8.22  | 6.07E-39 | 4.37  | 8.48E-08 |
| <b>CMTR2</b>    | 55783  | cap methyltransferase 2                                   | 3.48  | 3.24E-20 |       |          |
| <b>CNP</b>      | 1267   | 2',3'-cyclic nucleotide 3' phosphodiesterase              | 2.25  | 2.32E-10 |       |          |
| <b>COL1A1</b>   | 1277   | collagen type I alpha 1 chain                             |       |          | -3.50 | 4.15E-04 |
| <b>COL3A1</b>   | 1281   | collagen type III alpha 1 chain                           |       |          | -3.28 | 3.22E-04 |
| <b>CRYM</b>     | 1428   | crystallin mu                                             | 5.73  | 3.78E-08 |       |          |
| <b>CSDC2</b>    | 27254  | cold shock domain containing C2                           | 3.86  | 3.21E-28 |       |          |
| <b>CSRN1</b>    | 64651  | cysteine and serine rich nuclear protein 1                | 2.64  | 2.49E-04 |       |          |
| <b>CTC1</b>     | 80169  | CST telomere replication complex component 1              | 3.26  | 3.61E-16 |       |          |
| <b>CTSS</b>     | 1520   | cathepsin S                                               | 2.84  | 8.90E-08 |       |          |
| <b>CXCL10</b>   | 3627   | C-X-C motif chemokine ligand 10                           | 11.01 | 1.33E-12 |       |          |
| <b>CXCL2</b>    | 2920   | C-X-C motif chemokine ligand 2                            | 6.08  | 4.82E-06 |       |          |
| <b>CXCL8</b>    | 3576   | C-X-C motif chemokine ligand 8                            | 6.68  | 3.76E-05 |       |          |
| <b>CYP2J2</b>   | 1573   | cytochrome P450 family 2 subfamily J member 2             | 7.05  | 1.28E-07 |       |          |
| <b>CYTH1</b>    | 9267   | cytohesin 1                                               | 1.98  | 2.52E-06 |       |          |
| <b>DAXX</b>     | 1616   | death domain associated protein                           | 2.82  | 1.21E-13 |       |          |
| <b>DDX58</b>    | 23586  | DEXD/H-box helicase 58                                    | 5.18  | 4.24E-77 | 3.72  | 1.08E-31 |
| <b>DEPP1</b>    | 11067  | DEPP1, autophagy regulator                                | 3.61  | 6.41E-05 |       |          |
| <b>DHX58</b>    | 79132  | DEXH-box helicase 58                                      | 5.86  | 2.92E-75 | 3.99  | 2.90E-27 |
| <b>DNAJC1</b>   | 64215  | DnaJ heat shock protein family (Hsp40) member C1          | 2.42  | 4.92E-07 |       |          |
| <b>DRAM1</b>    | 55332  | DNA damage regulated autophagy modulator 1                | 3.49  | 1.21E-24 |       |          |
| <b>DTX3L</b>    | 151636 | deltex E3 ubiquitin ligase 3L                             | 4.82  | 6.81E-94 | 3.61  | 2.86E-42 |
| <b>EGR2</b>     | 1959   | early growth response 2                                   | 3.67  | 2.65E-17 |       |          |
| <b>EHD4</b>     | 30844  | EH domain containing 4                                    | 3.46  | 1.21E-09 |       |          |
| <b>EIF2AK2</b>  | 5610   | eukaryotic translation initiation factor 2 alpha kinase 2 | 3.33  | 2.23E-08 |       |          |
| <b>ELMO2</b>    | 63916  | engulfment and cell motility 2                            | 2.36  | 2.84E-13 |       |          |
| <b>EPSTI1</b>   | 94240  | epithelial stromal interaction 1                          | 4.51  | 1.86E-15 | 3.32  | 4.47E-06 |
| <b>ERAP2</b>    | 64167  | endoplasmic reticulum aminopeptidase 2                    | 2.29  | 8.35E-05 |       |          |
| <b>ESPNL</b>    | 339768 | espin like                                                | 2.78  | 2.31E-05 |       |          |
| <b>FAM111B</b>  | 374393 | family with sequence similarity 111 member B              | 3.08  | 2.21E-04 |       |          |
| <b>FAM192A</b>  | 80011  | family with sequence similarity 192 member A              | 2.20  | 1.24E-05 |       |          |
| <b>FAM3B</b>    | 54097  | family with sequence similarity 3 member B                | 9.41  | 8.65E-13 | 6.80  | 2.65E-05 |
| <b>FAM46A</b>   | 55603  | family with sequence similarity 46 member A               | 2.51  | 2.24E-07 |       |          |
| <b>FBP1</b>     | 2203   | fructose-bisphosphatase 1                                 |       |          | 4.09  | 2.93E-05 |
| <b>FBXO16</b>   | 157574 | F-box protein 16                                          | 3.17  | 3.24E-09 |       |          |
| <b>FBXO33</b>   | 254170 | F-box protein 33                                          | 3.61  | 6.56E-13 |       |          |

|               |        |                                                                            |       |           |       |          |
|---------------|--------|----------------------------------------------------------------------------|-------|-----------|-------|----------|
| <b>FCHSD2</b> | 9873   | FCH and double SH3 domains 2                                               | 2.40  | 1.44E-04  |       |          |
| <b>FITM2</b>  | 128486 | fat storage inducing transmembrane protein 2                               | -2.33 | 3.75E-10  |       |          |
| <b>FMDV</b>   |        | Foot-and-mouth disease virus genome                                        | 17.76 | 6.46E-35  |       |          |
| <b>FOXS1</b>  | 2307   | forkhead box S1                                                            | 4.80  | 4.12E-05  |       |          |
| <b>GBP2</b>   | 2634   | guanylate binding protein 2                                                | 6.25  | 2.03E-44  | 3.16  | 8.70E-07 |
| <b>GBP4</b>   | 115361 | guanylate binding protein 4                                                | 9.44  | 8.43E-36  | 7.58  | 2.83E-21 |
| <b>GBP5</b>   | 115362 | guanylate binding protein 5                                                | 6.39  | 1.50E-30  | 3.57  | 3.88E-06 |
| <b>GMIP</b>   | 51291  | GEM interacting protein                                                    | 2.84  | 2.52E-08  |       |          |
| <b>GPR63</b>  | 81491  | G protein-coupled receptor 63                                              | 3.41  | 2.35E-04  |       |          |
| <b>GPR65</b>  | 8477   | G protein-coupled receptor 65                                              | 2.70  | 5.10E-04  |       |          |
| <b>GRINA</b>  | 2907   | glutamate ionotropic receptor NMDA type subunit associated protein 1       | 2.64  | 4.05E-13  |       |          |
| <b>GTF2B</b>  | 2959   | general transcription factor IIB                                           | 4.44  | 1.31E-40  |       |          |
| <b>HBEGF</b>  | 1839   | heparin binding EGF like growth factor                                     | 3.63  | 2.88E-10  |       |          |
| <b>HECTD2</b> | 143279 | HECT domain E3 ubiquitin protein ligase 2                                  | 3.96  | 2.16E-17  |       |          |
| <b>HERC5</b>  | 51191  | HECT and RLD domain containing E3 ubiquitin protein ligase 5               | 4.83  | 2.25E-23  | 2.77  | 2.57E-04 |
| <b>HERC6</b>  | 55008  | HECT and RLD domain containing E3 ubiquitin protein ligase family member 6 | 5.42  | 3.58E-48  | 3.87  | 9.44E-20 |
| <b>HOMER</b>  | 57594  | homeobox and leucine zipper encoding                                       | 2.11  | 2.49E-11  |       |          |
| <b>HS3ST1</b> | 9957   | heparan sulfate-glucosamine 3-sulfotransferase 1                           | 4.31  | 4.36E-09  |       |          |
| <b>HTRA3</b>  | 94031  | HtrA serine peptidase 3                                                    |       |           | -3.21 | 2.93E-07 |
| <b>IDO1</b>   | 3620   | indoleamine 2,3-dioxygenase 1                                              | 11.56 | 2.47E-47  |       |          |
| <b>IER2</b>   | 9592   | immediate early response 2                                                 | 2.17  | 7.38E-05  |       |          |
| <b>IFI16</b>  | 3428   | interferon gamma inducible protein 16                                      | 3.84  | 5.81E-19  | 2.53  | 7.33E-05 |
| <b>IFI27</b>  | 3429   | interferon alpha inducible protein 27                                      | 8.11  | 2.71E-101 | 8.18  | 1.95E-92 |
| <b>IFI35</b>  | 3430   | interferon induced protein 35                                              | 3.40  | 1.05E-19  | 2.31  | 4.96E-05 |
| <b>IFI44</b>  | 10561  | interferon induced protein 44                                              | 6.70  | 2.33E-20  | 5.52  | 3.24E-12 |
| <b>IFI44L</b> | 10964  | interferon induced protein 44 like                                         | 5.74  | 7.25E-67  | 3.89  | 2.65E-24 |
| <b>IFI6</b>   | 2537   | interferon alpha inducible protein 6                                       | 6.00  | 8.16E-20  | 5.85  | 3.98E-18 |
| <b>IFIH1</b>  | 64135  | interferon induced with helicase C domain 1                                | 6.49  | 9.33E-60  | 4.30  | 5.93E-21 |
| <b>IFIT2</b>  | 3433   | interferon induced protein with tetratricopeptide repeats 2                | 10.98 | 7.92E-89  | 5.94  | 5.93E-21 |
| <b>IFIT3</b>  | 3437   | interferon induced protein with tetratricopeptide repeats 3                | 6.74  | 1.38E-22  |       |          |
| <b>IFIT5</b>  | 24138  | interferon induced protein with tetratricopeptide repeats 5                | 2.83  | 5.12E-13  |       |          |
| <b>IFITM1</b> | 8519   | interferon induced transmembrane protein 1                                 | 4.12  | 4.96E-19  | 3.58  | 2.05E-12 |
| <b>IFITM2</b> | 10581  | interferon induced transmembrane protein 2                                 | 9.76  | 1.90E-36  |       |          |
| <b>IFNB1</b>  | 3456   | interferon beta 1                                                          | 10.47 | 5.67E-53  |       |          |
| <b>IL15RA</b> | 3601   | interleukin 15 receptor subunit alpha                                      | 4.04  | 1.76E-15  |       |          |
| <b>IL18</b>   | 3606   | interleukin 18                                                             | 2.95  | 1.05E-12  |       |          |
| <b>IL18BP</b> | 10068  | interleukin 18 binding protein                                             | 2.42  | 2.05E-07  |       |          |
| <b>IL3RA</b>  | 3563   | interleukin 3 receptor subunit alpha                                       | 6.19  | 2.65E-17  |       |          |
| <b>IL4I1</b>  | 259307 | interleukin 4 induced 1                                                    | 4.04  | 5.43E-13  |       |          |
| <b>IL6</b>    | 3569   | interleukin 6                                                              | 6.21  | 2.15E-09  |       |          |
| <b>IP6K1</b>  | 9807   | inositol hexakisphosphate kinase 1                                         | 2.10  | 5.69E-10  |       |          |
| <b>IQCD</b>   | 115811 | IQ motif containing D                                                      | 3.81  | 1.82E-08  |       |          |
| <b>IRF1</b>   | 3659   | interferon regulatory factor 1                                             | 3.60  | 4.93E-07  |       |          |

|                     |           |                                                             |       |          |      |          |
|---------------------|-----------|-------------------------------------------------------------|-------|----------|------|----------|
| <b>IRF3</b>         | 3661      | interferon regulatory factor 3                              | 2.06  | 7.33E-05 |      |          |
| <b>IRF5</b>         | 3663      | interferon regulatory factor 5                              | 3.46  | 4.08E-04 |      |          |
| <b>IRF7</b>         | 3665      | interferon regulatory factor 7                              | 4.99  | 9.68E-22 | 2.85 | 4.52E-04 |
| <b>IRF9</b>         | 10379     | interferon regulatory factor 9                              | 3.10  | 3.76E-32 | 1.99 | 2.61E-06 |
| <b>ISG15</b>        | 9636      | ISG15 ubiquitin-like modifier                               | 11.18 | 3.46E-80 | 8.99 | 8.10E-47 |
| <b>ITPR2</b>        | 3709      | inositol 1,4,5-trisphosphate receptor type 2                | 2.32  | 6.00E-14 |      |          |
| <b>JAKMIP3</b>      | 282973    | Janus kinase and microtubule interacting protein 3          | 4.23  | 5.42E-22 |      |          |
| <b>KIF5C</b>        | 3800      | kinesin family member 5C                                    | 9.89  | 5.28E-32 |      |          |
| <b>KIFC3</b>        | 3801      | kinesin family member C3                                    | 2.73  | 3.48E-04 |      |          |
| <b>LAYN</b>         | 143903    | layilin                                                     | 3.38  | 4.51E-06 |      |          |
| <b>LEKR1</b>        | 389170    | leucine, glutamate and lysine rich 1                        | 4.93  | 4.45E-20 |      |          |
| <b>LGALS3BP</b>     | 3959      | galectin 3 binding protein                                  | 2.52  | 1.63E-04 |      |          |
| <b>LGALS9</b>       | 3965      | galectin 9                                                  | 4.37  | 1.06E-04 |      |          |
| <b>LOC100139670</b> | 100139670 | interferon-induced protein with tetratricopeptide repeats 1 | 5.81  | 6.09E-21 | 3.58 | 2.32E-05 |
| <b>LOC100298356</b> | 100298356 | bone marrow stromal antigen 2                               | 9.04  | 7.68E-34 | 6.48 | 4.52E-15 |
| <b>LOC100336669</b> | 100336669 | guanylate-binding protein 4                                 | 5.96  | 1.91E-50 | 3.25 | 1.25E-09 |
| <b>LOC101902757</b> | 101902757 | uncharacterized LOC101902757                                | 4.32  | 4.04E-05 |      |          |
| <b>LOC101903126</b> | 101903126 | interferon-induced very large GTPase 1-like                 | 5.94  | 3.92E-04 |      |          |
| <b>LOC101903326</b> | 101903326 | zinc finger protein 485                                     | -2.20 | 5.86E-04 |      |          |
| <b>LOC101903473</b> | 101903473 | uncharacterized LOC101903473                                | 4.07  | 9.72E-24 | 2.43 | 3.46E-04 |
| <b>LOC101905355</b> | 101905355 | uncharacterized LOC101905355                                | 5.49  | 3.05E-11 |      |          |
| <b>LOC101907348</b> | 101907348 | uncharacterized LOC101907348                                | 3.47  | 1.61E-09 |      |          |
| <b>LOC101907799</b> | 101907799 | uncharacterized LOC101907799                                | 13.48 | 2.47E-29 | 8.67 | 3.94E-11 |
| <b>LOC101907813</b> | 101907813 | uncharacterized LOC101907813                                | 3.39  | 3.77E-08 |      |          |
| <b>LOC101908206</b> | 101908206 | uncharacterized LOC101908206                                | -2.64 | 8.82E-05 |      |          |
| <b>LOC104968925</b> | 104968925 | uncharacterized LOC104968925                                | 5.14  | 1.55E-25 |      |          |
| <b>LOC104970162</b> | 104970162 | uncharacterized LOC104970162                                | 3.31  | 1.48E-07 |      |          |
| <b>LOC104970840</b> | 104970840 | uncharacterized LOC104970840                                | 4.02  | 5.55E-10 |      |          |
| <b>LOC104971726</b> | 104971726 | uncharacterized LOC104971726                                | 7.96  | 8.45E-16 |      |          |
| <b>LOC104972593</b> | 104972593 | uncharacterized LOC104972593                                | 10.67 | 1.83E-16 | 7.17 | 5.19E-06 |
| <b>LOC104973892</b> | 104973892 | uncharacterized LOC104973892                                | 3.51  | 5.51E-15 |      |          |
| <b>LOC104975716</b> | 104975716 | leukocyte elastase inhibitor pseudogene                     | 2.23  | 6.64E-05 |      |          |
| <b>LOC107131142</b> | 107131142 | tumor necrosis factor ligand superfamily member 13B-like    | 5.70  | 8.21E-08 | 4.79 | 2.57E-04 |
| <b>LOC107131199</b> | 107131199 | cysteine/serine-rich nuclear protein 2                      | 2.14  | 4.04E-04 |      |          |
| <b>LOC107131472</b> | 107131472 | vomeroneasal type-1 receptor 4-like                         | 3.20  | 1.20E-05 |      |          |
| <b>LOC107131864</b> | 107131864 | eukaryotic translation initiation factor 4E pseudogene      | 4.91  | 1.77E-17 | 3.04 | 3.87E-04 |
| <b>LOC107132217</b> | 107132217 | uncharacterized LOC107132217                                | 8.54  | 1.06E-29 | 6.48 | 1.59E-14 |
| <b>LOC107132617</b> | 107132617 | uncharacterized LOC107132617                                | 3.97  | 7.61E-09 |      |          |
| <b>LOC107132911</b> | 107132911 | uncharacterized LOC107132911                                | 2.32  | 2.84E-04 |      |          |
| <b>LOC507055</b>    | 507055    | guanylate-binding protein 4                                 | 7.60  | 1.28E-73 | 4.54 | 2.18E-20 |
| <b>LOC508153</b>    | 508153    | uncharacterized LOC508153                                   | 3.47  | 1.54E-07 | 2.96 | 8.43E-04 |
| <b>LOC509283</b>    | 509283    | E3 ubiquitin-protein ligase RNF213                          | 4.76  | 1.55E-80 | 2.87 | 2.50E-19 |
| <b>LOC510382</b>    | 510382    | guanylate-binding protein 6-like                            | 6.29  | 1.08E-54 | 3.19 | 1.01E-08 |
| <b>LOC511531</b>    | 511531    | guanylate-binding protein 1                                 | 5.70  | 1.00E-38 | 2.63 | 5.14E-04 |



|                  |        |                                                             |       |           |       |           |
|------------------|--------|-------------------------------------------------------------|-------|-----------|-------|-----------|
| <b>LOC511936</b> | 511936 | cytochrome P450, family 2, subfamily J                      | 6.32  | 4.29E-06  |       |           |
| <b>LOC512486</b> | 512486 | interferon-induced guanylate-binding protein 1              | 5.51  | 2.37E-42  | 4.13  | 3.23E-19  |
| <b>LOC512672</b> | 512672 | major histocompatibility complex, class I                   | 2.44  | 6.07E-09  |       |           |
| <b>LOC513659</b> | 513659 | guanylate-binding protein 6                                 | 7.06  | 2.17E-10  |       |           |
| <b>LOC613699</b> | 613699 | interferon-induced transmembrane protein 1                  | 3.42  | 4.20E-05  |       |           |
| <b>LOC616948</b> | 616948 | tripartite motif-containing protein 5-like                  | 3.41  | 1.65E-12  |       |           |
| <b>LOC618409</b> | 618409 | interferon regulatory factor 4                              | 7.12  | 1.45E-49  | 3.40  | 3.07E-07  |
| <b>LOC618737</b> | 618737 | bone marrow stromal antigen 2                               | 10.33 | 8.38E-119 | 8.70  | 7.29E-46  |
| <b>LOC781710</b> | 781710 | guanylate-binding protein 2                                 | 7.78  | 1.45E-49  | 6.10  | 9.04E-20  |
| <b>LOC783920</b> | 783920 | interferon-induced very large GTPase 1-like                 | 5.14  | 3.14E-14  |       |           |
| <b>LOC786073</b> | 786073 | interferon-induced transmembrane protein 1-like             | 4.04  | 5.67E-04  |       |           |
| <b>LOC786372</b> | 786372 | golgin subfamily A member 6-like protein 22                 | 5.33  | 2.84E-18  |       |           |
| <b>LY6E</b>      | 4061   | lymphocyte antigen 6 family member E                        |       |           | 3.45  | 2.61E-06  |
| <b>MAD2L2</b>    | 10459  | mitotic arrest deficient 2 like 2                           | 3.14  | 3.33E-14  |       |           |
| <b>MANF</b>      | 7873   | mesencephalic astrocyte derived neurotrophic factor         | 2.25  | 2.84E-04  |       |           |
| <b>MAP1LC3C</b>  | 440738 | microtubule associated protein 1 light chain 3 gamma        | 7.76  | 1.03E-05  |       |           |
| <b>MAP3K8</b>    | 1326   | mitogen-activated protein kinase kinase kinase 8            | 2.31  | 4.65E-04  |       |           |
| <b>MARCKSL1</b>  | 65108  | MARCKS like 1                                               | 3.00  | 1.65E-08  |       |           |
| <b>MASTL</b>     | 84930  | microtubule associated serine/threonine kinase like         | 3.21  | 9.94E-10  |       |           |
| <b>MAT2B</b>     | 27430  | methionine adenosyltransferase 2B                           | 2.00  | 5.83E-04  |       |           |
| <b>MB21D1</b>    | 782472 | Mab-21 domain containing 1                                  | 6.72  | 5.14E-38  | 3.32  | 1.60E-05  |
| <b>MCHR1</b>     | 2847   | melanin concentrating hormone receptor 1                    | 6.14  | 3.85E-22  |       |           |
| <b>MED17</b>     | 9440   | mediator complex subunit 17                                 | 2.12  | 2.89E-07  |       |           |
| <b>MIC1</b>      | 533051 | major histocompatibility class I related protein            | 3.41  | 2.31E-15  |       |           |
| <b>MITD1</b>     | 129531 | microtubule interacting and trafficking domain containing 1 | 2.39  | 5.63E-06  |       |           |
| <b>MOV10</b>     | 4343   | Mov10 RISC complex RNA helicase                             | 2.98  | 6.40E-08  |       |           |
| <b>MSC</b>       | 9242   | musculin                                                    | 2.03  | 2.05E-04  |       |           |
| <b>MTFP1</b>     | 51537  | mitochondrial fission process 1                             | 2.35  | 1.85E-05  |       |           |
| <b>MUC5B</b>     | 727897 | mucin 5B, oligomeric mucus/gel-forming                      | 4.71  | 1.41E-11  |       |           |
| <b>MX1</b>       | 4599   | MX dynamin like GTPase 1                                    | 8.04  | 4.06E-164 | 6.87  | 4.53E-112 |
| <b>MX2</b>       | 4600   | MX dynamin like GTPase 2                                    | 13.02 | 3.92E-122 | 10.00 | 1.56E-66  |
| <b>MYLK</b>      | 4638   | myosin light chain kinase                                   |       |           | -3.26 | 9.60E-07  |
| <b>NAMPT</b>     | 10135  | nicotinamide phosphoribosyltransferase                      | 2.99  | 5.70E-06  |       |           |
| <b>NCAM1</b>     | 4684   | neural cell adhesion molecule 1                             |       |           | -4.48 | 3.34E-04  |
| <b>NECTIN2</b>   | 5819   | nectin cell adhesion molecule 2                             | 2.40  | 6.67E-12  |       |           |
| <b>NFKBIA</b>    | 4792   | NFKB inhibitor alpha                                        | 3.75  | 1.02E-07  |       |           |
| <b>NFKBIB</b>    | 4793   | NFKB inhibitor beta                                         | 2.17  | 1.29E-05  |       |           |
| <b>NFKBIE</b>    | 4794   | NFKB inhibitor epsilon                                      | 2.70  | 4.20E-05  |       |           |
| <b>NLRC5</b>     | 84166  | NLR family CARD domain containing 5                         | 4.40  | 1.17E-07  |       |           |
| <b>NMES1</b>     | 84419  | Normal Mucosa Of Esophagus Specific 1                       | 3.43  | 3.23E-23  |       |           |
| <b>NOTCH3</b>    | 4854   | notch 3                                                     | 3.68  | 5.25E-05  |       |           |
| <b>NR3C1</b>     | 2908   | nuclear receptor subfamily 3 group C member 1               | 2.09  | 9.67E-09  |       |           |

|                 |        |                                                         |       |          |      |          |
|-----------------|--------|---------------------------------------------------------|-------|----------|------|----------|
| <b>NR4A3</b>    | 8013   | nuclear receptor subfamily 4 group A member 3           | 4.71  | 4.15E-08 |      |          |
| <b>NUB1</b>     | 51667  | negative regulator of ubiquitin like proteins 1         | 2.01  | 2.04E-04 |      |          |
| <b>OAS1X</b>    | 347699 | 2',5'-oligoadenylate synthetase 1, 40/46kDa             | 6.41  | 3.86E-81 | 5.82 | 1.47E-60 |
| <b>OAS1Y</b>    | 654488 | 2',5'-oligoadenylate synthetase 1, 40/46kDa             | 6.70  | 1.35E-61 | 5.84 | 1.77E-43 |
| <b>OAS1Z</b>    | 519922 | 2',5'-oligoadenylate synthetase 1, 40/46kDa             | 6.99  | 9.33E-60 | 6.78 | 2.30E-49 |
| <b>OAS2</b>     | 4939   | 2'-5'-oligoadenylate synthetase 2                       | 9.15  | 5.93E-80 | 6.01 | 2.45E-28 |
| <b>OLR1</b>     | 4973   | oxidized low density lipoprotein receptor 1             | 4.20  | 5.44E-08 |      |          |
| <b>ONECUT2</b>  | 9480   | one cut homeobox 2                                      | 4.03  | 4.78E-04 |      |          |
| <b>PARM1</b>    | 25849  | prostate androgen-regulated mucin-like protein 1        | 4.76  | 1.93E-11 |      |          |
| <b>PARP10</b>   | 84875  | poly(ADP-ribose) polymerase family member 10            | 4.30  | 7.31E-19 |      |          |
| <b>PARP12</b>   | 64761  | poly(ADP-ribose) polymerase family member 12            | 4.65  | 2.49E-40 | 3.32 | 1.35E-15 |
| <b>PARP14</b>   | 54625  | poly(ADP-ribose) polymerase family member 14            | 4.51  | 1.34E-55 | 3.03 | 4.57E-18 |
| <b>PARP9</b>    | 83666  | poly(ADP-ribose) polymerase family member 9             | 3.53  | 7.94E-43 | 3.44 | 1.50E-38 |
| <b>PDE12</b>    | 201626 | phosphodiesterase 12                                    | 1.90  | 9.11E-05 |      |          |
| <b>PDK1</b>     | 5163   | pyruvate dehydrogenase kinase 1                         | -2.43 | 7.00E-05 |      |          |
| <b>PELI1</b>    | 57162  | pellino E3 ubiquitin protein ligase 1                   | 1.97  | 7.84E-04 |      |          |
| <b>PHLDA1</b>   | 22822  | pleckstrin homology like domain family A member 1       | 3.39  | 5.96E-05 |      |          |
| <b>PLAC8</b>    | 51316  | placenta specific 8                                     | 8.34  | 1.87E-14 | 8.80 | 4.74E-11 |
| <b>PLEKHA4</b>  | 57664  | pleckstrin homology domain containing A4                | 3.50  | 8.77E-36 |      |          |
| <b>PLSCR2</b>   | 57047  | phospholipid scramblase 2                               | 3.43  | 1.93E-11 |      |          |
| <b>PMAIP1</b>   | 5366   | phorbol-12-myristate-13-acetate-induced protein 1       | 2.69  | 1.31E-08 |      |          |
| <b>PML</b>      | 5371   | promyelocytic leukemia                                  | 4.11  | 1.53E-30 |      |          |
| <b>PNPT1</b>    | 87178  | polyribonucleotide nucleotidyltransferase 1             | 3.65  | 2.83E-20 |      |          |
| <b>POLH</b>     | 5429   | DNA polymerase eta                                      | 2.46  | 2.07E-07 |      |          |
| <b>PPA1</b>     | 5464   | pyrophosphatase (inorganic) 1                           | 2.23  | 1.55E-05 |      |          |
| <b>PPP1R15A</b> | 23645  | protein phosphatase 1 regulatory subunit 15A            | 2.98  | 3.88E-11 |      |          |
| <b>PPP2R3C</b>  | 55012  | protein phosphatase 2 regulatory subunit B"gamma        | 3.46  | 8.19E-13 |      |          |
| <b>PRICKLE3</b> | 4007   | prickle planar cell polarity protein 3                  | 2.72  | 2.84E-08 |      |          |
| <b>PSMB10</b>   | 5699   | proteasome subunit beta 10                              | 2.41  | 2.18E-04 |      |          |
| <b>PSMB8</b>    | 5696   | proteasome subunit beta 8                               | 3.30  | 2.94E-09 |      |          |
| <b>PSMB9</b>    | 5698   | proteasome subunit beta 9                               | 4.31  | 2.05E-06 |      |          |
| <b>PSME2</b>    | 5721   | proteasome activator subunit 2                          | 2.22  | 2.29E-04 |      |          |
| <b>PSMF1</b>    | 9491   | proteasome inhibitor subunit 1                          | 2.87  | 7.13E-07 |      |          |
| <b>PTGIR</b>    | 5739   | prostaglandin I2 receptor                               | 5.60  | 1.56E-05 |      |          |
| <b>RAB37</b>    | 326624 | RAB37, member RAS oncogene family                       | 5.82  | 3.56E-04 |      |          |
| <b>RAB3IL1</b>  | 5866   | RAB3A interacting protein like 1                        | -1.91 | 9.57E-04 |      |          |
| <b>RAB8B</b>    | 51762  | RAB8B, member RAS oncogene family                       | 2.45  | 3.39E-06 |      |          |
| <b>RASSF1</b>   | 11186  | Ras association domain family member 1                  | 2.96  | 1.32E-10 |      |          |
| <b>RBCK1</b>    | 10616  | RANBP2-type and C3HC4-type zinc finger containing 1     | 1.82  | 3.60E-04 |      |          |
| <b>RBM43</b>    | 375287 | RNA binding motif protein 43                            | 2.95  | 4.71E-04 |      |          |
| <b>RBMS2</b>    | 5939   | RNA binding motif single stranded interacting protein 2 | 2.42  | 3.38E-06 |      |          |

|                 |        |                                                          |       |          |       |          |
|-----------------|--------|----------------------------------------------------------|-------|----------|-------|----------|
| <b>RHBDF2</b>   | 79651  | rhomboid 5 homolog 2                                     | 2.64  | 2.36E-04 |       |          |
| <b>RIPK3</b>    | 11035  | receptor interacting serine/threonine kinase 3           | 2.64  | 4.33E-06 |       |          |
| <b>RNASEL</b>   | 6041   | ribonuclease L                                           | 2.54  | 2.33E-06 |       |          |
| <b>RNF114</b>   | 55905  | ring finger protein 114                                  | 2.48  | 4.07E-06 |       |          |
| <b>RNF19B</b>   | 127544 | ring finger protein 19B                                  | 3.30  | 2.92E-13 |       |          |
| <b>RSAD2</b>    | 91543  | radical S-adenosyl methionine domain containing 2        | 12.17 | 1.59E-81 | 9.44  | 4.70E-42 |
| <b>RSL1D1</b>   | 26156  | ribosomal L1 domain containing 1                         | 1.92  | 1.03E-09 |       |          |
| <b>RTP4</b>     | 64108  | receptor transporter protein 4                           | 4.15  | 5.96E-30 | 2.47  | 8.65E-06 |
| <b>SALL2</b>    | 6297   | spalt like transcription factor 2                        | -3.44 | 7.68E-06 |       |          |
| <b>SAMD9</b>    | 54809  | sterile alpha motif domain containing 9                  | 4.50  | 5.85E-08 |       |          |
| <b>SAT1</b>     | 6303   | spermidine/spermine N1-acetyltransferase 1               | 2.50  | 2.07E-04 |       |          |
| <b>SCLY</b>     | 51540  | selenocysteine lyase                                     | 3.47  | 2.62E-12 |       |          |
| <b>SCRN1</b>    | 9805   | secernin 1                                               | -3.68 | 1.07E-05 |       |          |
| <b>SFRP2</b>    | 6423   | secreted frizzled related protein 2                      |       |          | -4.16 | 3.30E-05 |
| <b>SLC15A3</b>  | 51296  | solute carrier family 15 member 3                        | 6.42  | 2.05E-45 |       |          |
| <b>SLC25A19</b> | 60386  | solute carrier family 25 member 19                       | 3.23  | 3.66E-32 |       |          |
| <b>SLC25A28</b> | 81894  | solute carrier family 25 member 28                       | 2.37  | 4.49E-05 |       |          |
| <b>SLFN11</b>   | 91607  | schlafen family member 11                                | 6.08  | 4.79E-21 | 3.71  | 2.64E-05 |
| <b>SLFN12</b>   | 55106  | schlafen family member 12                                | 3.30  | 1.03E-05 |       |          |
| <b>SMAGP</b>    | 57228  | small cell adhesion glycoprotein                         | 2.44  | 6.06E-05 |       |          |
| <b>SOCS1</b>    | 8651   | suppressor of cytokine signaling 1                       | 3.64  | 7.36E-05 |       |          |
| <b>SP100</b>    | 6672   | SP100 nuclear antigen                                    | 4.95  | 1.30E-21 | 3.07  | 3.31E-05 |
| <b>SP110</b>    | 3431   | SP110 nuclear body protein                               | 4.49  | 4.04E-40 |       |          |
| <b>SP140</b>    | 11262  | SP140 nuclear body protein                               | 4.06  | 3.53E-10 |       |          |
| <b>SP140L</b>   | 93349  | SP140 nuclear body protein like                          | 2.38  | 2.03E-07 |       |          |
| <b>SPTLC2</b>   | 9517   | serine palmitoyltransferase long chain base subunit 2    | 2.08  | 5.88E-05 |       |          |
| <b>STARD5</b>   | 80765  | StAR related lipid transfer domain containing 5          | 1.94  | 1.62E-04 |       |          |
| <b>STARD8</b>   | 9754   | StAR related lipid transfer domain containing 8          | 2.72  | 5.98E-09 |       |          |
| <b>STAT2</b>    | 6773   | signal transducer and activator of transcription 2       | 2.42  | 1.47E-11 |       |          |
| <b>STK17A</b>   | 9263   | serine/threonine kinase 17a                              | 2.66  | 7.14E-05 |       |          |
| <b>SVIL</b>     | 6840   | supervillin                                              | 2.13  | 7.22E-06 |       |          |
| <b>SYNM</b>     | 23336  | synemin                                                  | 2.37  | 7.00E-05 |       |          |
| <b>SYTL3</b>    | 94120  | synaptotagmin like 3                                     | 4.13  | 1.08E-10 |       |          |
| <b>TAF3</b>     | 83860  | TATA-box binding protein associated factor 3             | 2.46  | 1.08E-05 |       |          |
| <b>TAF4B</b>    | 6875   | TATA-box binding protein associated factor 4b            | 3.62  | 6.19E-17 |       |          |
| <b>TAP1</b>     | 6890   | transporter 1, ATP binding cassette subfamily B member   | 4.46  | 5.65E-04 |       |          |
| <b>TDRD7</b>    | 23424  | tudor domain containing 7                                | 2.91  | 4.02E-24 |       |          |
| <b>TIFA</b>     | 92610  | TRAF interacting protein with forkhead associated domain | 5.63  | 6.96E-17 |       |          |
| <b>TMEM106A</b> | 113277 | transmembrane protein 106A                               | 3.61  | 1.05E-24 |       |          |
| <b>TMEM140</b>  | 55281  | transmembrane protein 140                                | 2.96  | 2.88E-10 |       |          |
| <b>TMEM268</b>  | 203197 | transmembrane protein 268                                | 2.07  | 4.79E-04 |       |          |
| <b>TMPRSS2</b>  | 7113   | transmembrane protease, serine 2                         | 3.08  | 2.52E-04 |       |          |
| <b>TNFAIP1</b>  | 7126   | TNF alpha induced protein 1                              | 1.95  | 9.12E-04 |       |          |

|                |        |                                                          |      |           |      |          |
|----------------|--------|----------------------------------------------------------|------|-----------|------|----------|
| <b>TNFAIP3</b> | 7128   | TNF alpha induced protein 3                              | 4.58 | 3.34E-17  |      |          |
| <b>TNFSF10</b> | 8743   | TNF superfamily member 10                                | 6.44 | 2.09E-32  | 3.79 | 2.22E-08 |
| <b>TNFSF4</b>  | 7292   | TNF superfamily member 4                                 | 3.48 | 3.76E-10  |      |          |
| <b>TRANK1</b>  | 9881   | tetratricopeptide repeat and ankyrin repeat containing 1 | 3.37 | 2.09E-23  |      |          |
| <b>TREX1</b>   | 11277  | three prime repair exonuclease 1                         | 3.80 | 2.81E-26  |      |          |
| <b>TRIM14</b>  | 9830   | tripartite motif containing 14                           | 3.83 | 2.26E-04  |      |          |
| <b>TRIM16</b>  | 10626  | tripartite motif containing 16                           | 2.33 | 1.63E-09  |      |          |
| <b>TRIM21</b>  | 6737   | tripartite motif containing 21                           | 4.10 | 2.79E-34  |      |          |
| <b>TRIM25</b>  | 7706   | tripartite motif containing 25                           | 2.29 | 9.35E-14  |      |          |
| <b>TRIM34</b>  | 53840  | tripartite motif containing 34                           | 3.77 | 1.94E-10  |      |          |
| <b>TRIM38</b>  | 10475  | tripartite motif containing 38                           | 3.01 | 9.76E-16  |      |          |
| <b>TRIM56</b>  | 81844  | tripartite motif containing 56                           | 1.98 | 4.54E-05  |      |          |
| <b>TSKU</b>    | 25987  | tsukushi, small leucine rich proteoglycan                | 2.51 | 3.14E-07  |      |          |
| <b>TWISTNB</b> | 221830 | TWIST neighbor                                           | 1.94 | 1.46E-04  |      |          |
| <b>UBA7</b>    | 7318   | ubiquitin like modifier activating enzyme 7              | 5.31 | 3.66E-24  | 3.64 | 2.33E-08 |
| <b>UNC93B1</b> | 81622  | unc-93 homolog B1, TLR signaling regulator               | 1.91 | 8.06E-06  |      |          |
| <b>USP18</b>   | 11274  | ubiquitin specific peptidase 18                          | 6.91 | 4.84E-61  | 5.00 | 8.63E-27 |
| <b>USP25</b>   | 29761  | ubiquitin specific peptidase 25                          | 2.35 | 2.58E-06  |      |          |
| <b>WARS</b>    | 7453   | tryptophanyl-tRNA synthetase                             | 3.24 | 4.42E-04  |      |          |
| <b>WDCP</b>    | 80304  | WD repeat and coiled coil containing                     | 1.96 | 5.89E-05  |      |          |
| <b>XAF1</b>    | 54739  | XIAP associated factor 1                                 | 7.06 | 2.28E-61  | 5.63 | 1.79E-35 |
| <b>XRN2</b>    | 22803  | 5'-3' exoribonuclease 2                                  | 1.96 | 2.79E-05  |      |          |
| <b>ZBP1</b>    | 81030  | Z-DNA binding protein 1                                  | 8.48 | 7.27E-122 | 7.17 | 2.65E-70 |
| <b>ZCCHC18</b> | 644353 | zinc finger CCHC-type containing 18                      | 2.56 | 2.18E-04  |      |          |
| <b>ZMYM5</b>   | 9205   | zinc finger MYM-type containing 5                        | 2.16 | 4.62E-04  |      |          |
| <b>ZNFX1</b>   | 57169  | zinc finger NFX1-type containing 1                       | 4.15 | 9.33E-60  | 2.76 | 4.05E-18 |
