# Supplementary figures and images for: Proteogenomics Uncovers Critical Elements of Host Response in Bovine Soft Palate Epithelial Cells Following In Vitro Infection with Foot-And-Mouth Disease Virus
Source: MDPI journal article supplement (doi:10.3390/v11010053), 2019-01-12

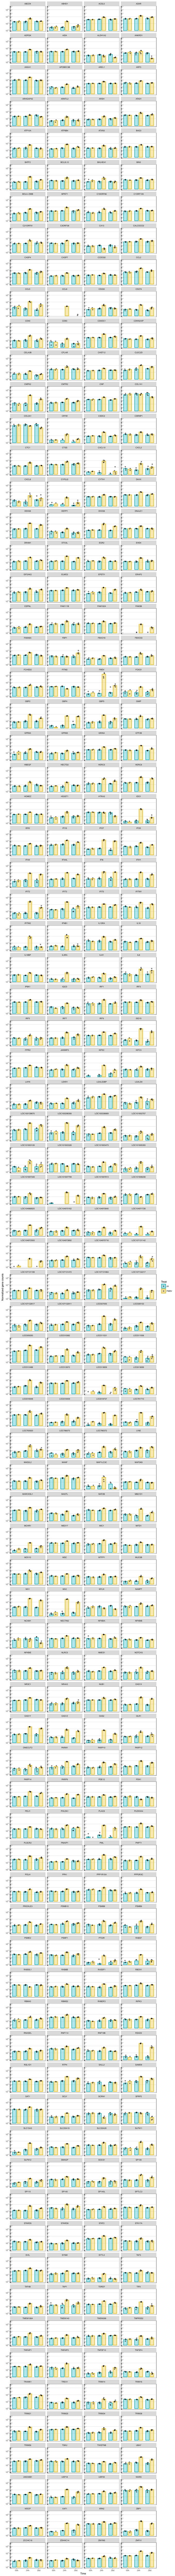

Supplement: s1 [file s1]
